# Supplementary material for: Timing of Surgery in Tubular Microdiscectomy for Lumbar Disc Herniation and Its Effect on Functional Impairment Outcomes
Source: PubMed Central journal article supplement — Neurospine. 2020 Mar 31;17(1):204–12. doi: 10.14245/ns.1938448.224 (PMC7136121; doi:10.14245/ns.1938448.224), 2020-03-31
Supplement: ns-1938448-224-suppl.pdf [file ns-1938448-224-suppl.pdf]

**Supplementary Table 1.** Baseline characteristics of the 2,614 patients who did not fulfil the inclusion criteria or who did not have the necessary data available

| Characteristic                       | Value        |
|--------------------------------------|--------------|
| Age (yr)                             | 48.3 ± 11.8  |
| Active smoker                        | 526 (56.2)   |
| Male sex                             | 1,447 (55.4) |
| Body mass index (kg/m <sup>2</sup> ) | 25.4 ± 3.4   |
| Height (cm)                          | 177.4 ± 10.3 |
| Weight (kg)                          | 79.9 ± 13.0  |
| Operation time (min)                 | 39.6 ± 106.8 |
| Length of hospital stay (hr)         | 23.1 ± 7.1   |
| ASA PS classification                |              |
| I                                    | 1,474 (65)   |
| II                                   | 767 (34)     |
| III                                  | 6 (0.3)      |
| Index level                          |              |
| L1–2                                 | 3 (0.1)      |
| L2–3                                 | 37 (1.5)     |
| L3–4                                 | 162 (6.4)    |
| L4–5                                 | 1,121 (44)   |
| L5–S1                                | 1,214 (48)   |
| Side                                 |              |
| Right                                | 1,093 (45)   |
| Left                                 | 1,243 (51)   |
| Median                               | 75 (3.1)     |
| Both sides                           | 16 (0.7)     |
| Baseline PROM values                 |              |
| ODI                                  | 49.4 ± 17.3  |
| NRS leg pain                         | 7.4 ± 2.1    |
| NRS pack pain                        | 5.4 ± 2.9    |

Values are presented as mean ± standard deviation or number (%). ASA PS, American Society of Anesthesiologists physical status; PROM, patient-reported outcome measure; ODI, Oswestry Disability Index; NRS, Numeric Rating Scale.
